# Supplementary material for: Cryptococcus neoformans Infection Induces IL-17 Production by Promoting STAT3 Phosphorylation in CD4+ T Cells
Source: PubMed Central journal article supplement (PMC9197778; doi:10.3389/fimmu.2022.872286), 2022-05-27
Supplement: DataSheet_1.pdf [file DataSheet_1.pdf]

**Figure S1**

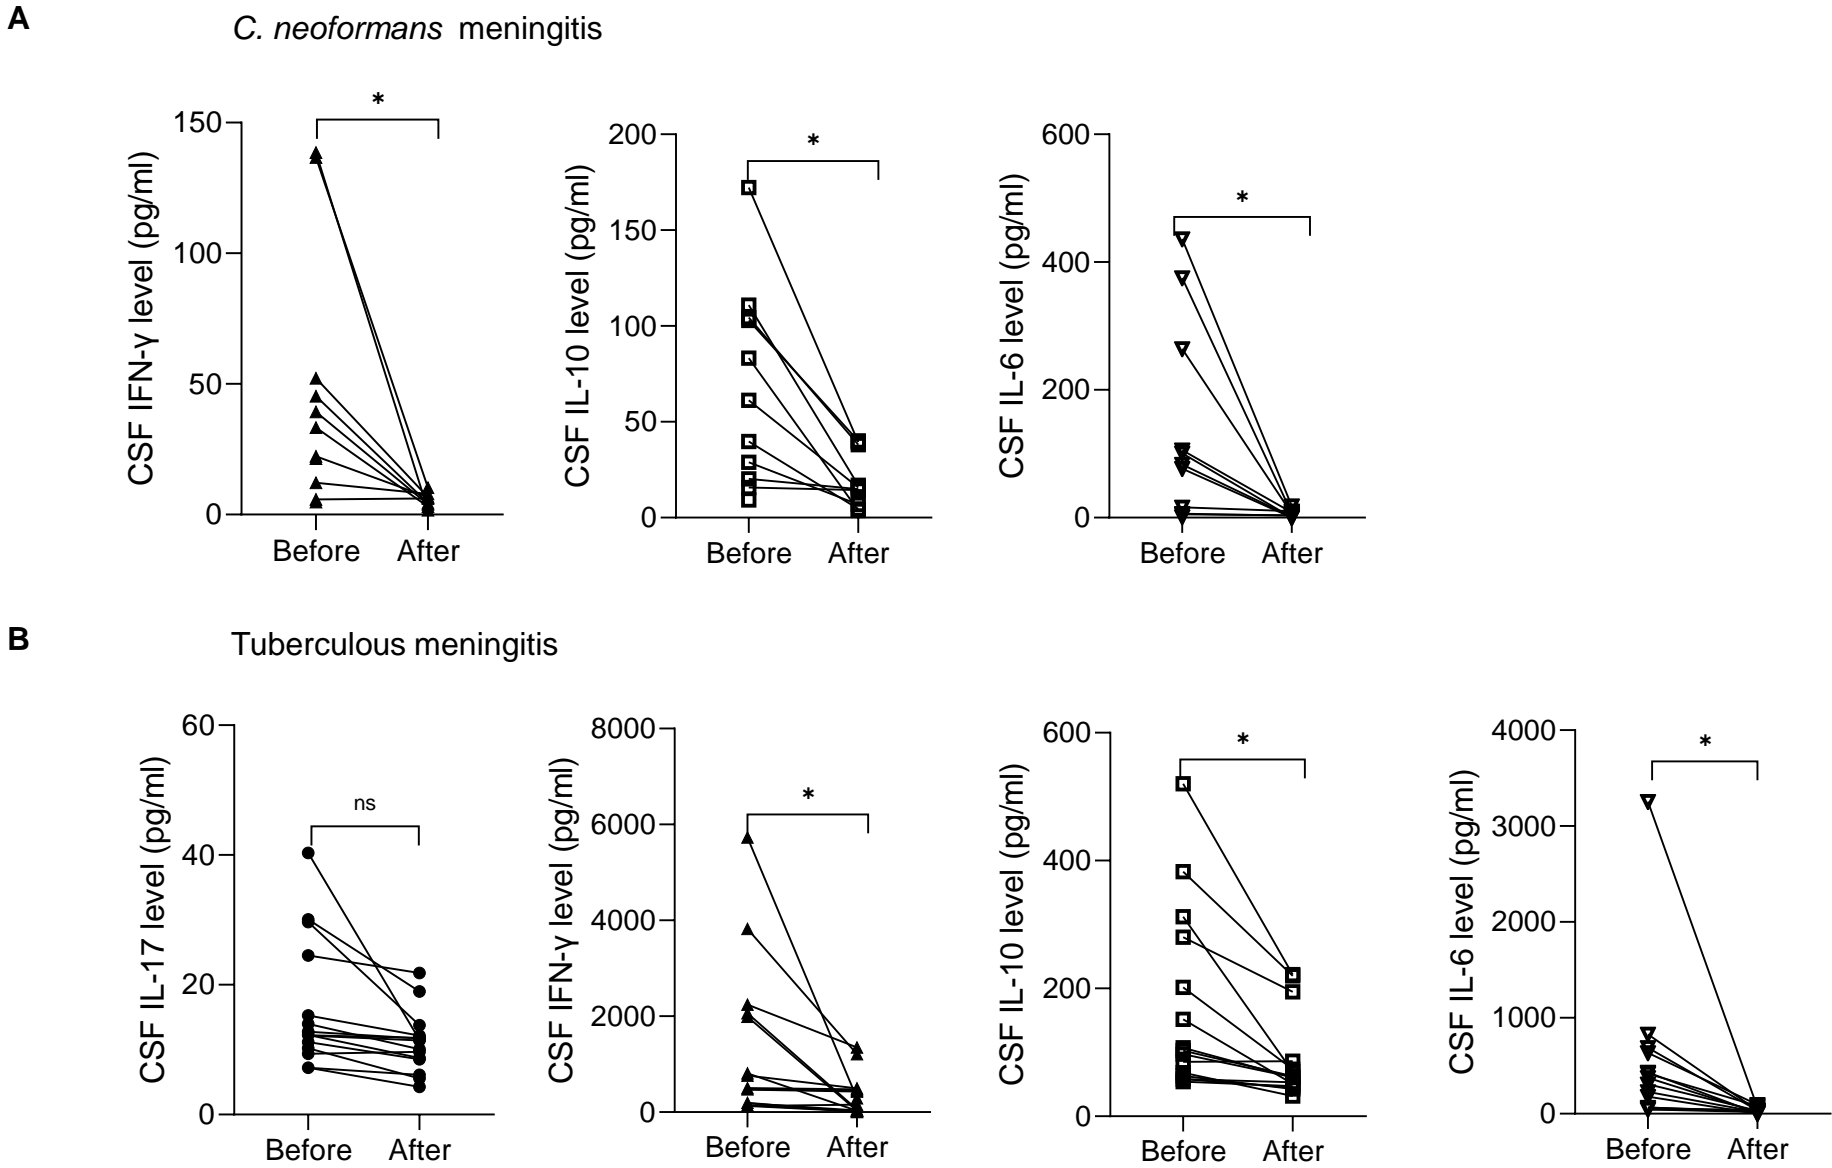

**Figure S1: Pathogen-specific therapies minimizes cytokine levels in cerebrospinal fluid of patients with meningitis.** Patients with *C. neoformans* meningitis or Tuberculous meningitis were treated with standard pathogen-specific therapies (anti-fungal therapy or anti-tuberculous therapy), cytokine levels in cerebrospinal fluid before and after anti-fungal therapy (A) or anti-tuberculous therapy (B) were evaluated by ELISA. \*0.01<p<0.05.

**Figure S2**

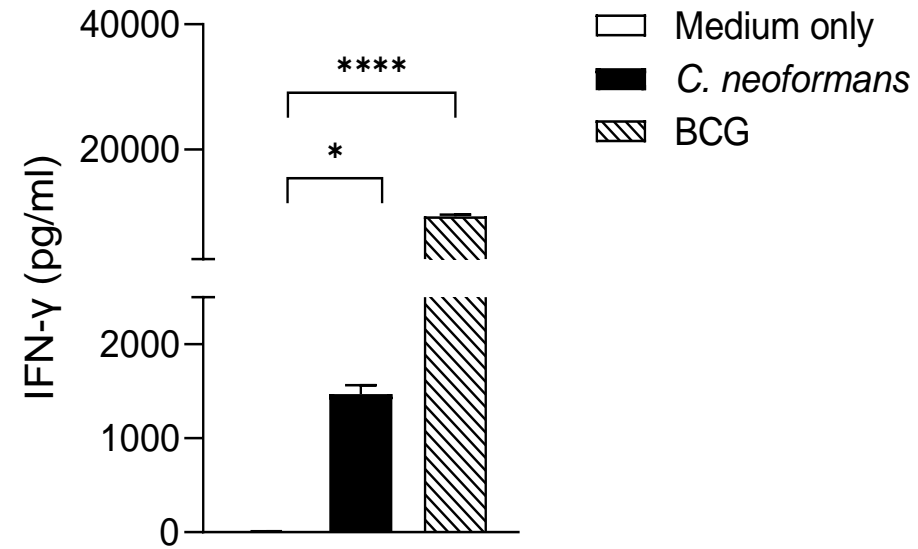

**Figure S2: *C. neoformans* and BCG differentially stimulate IFN- $\gamma$  expression by PBMCs.** PBMCs were stimulated with or without *C. neoformans* or BCG for 3 days, supernatant IFN- $\gamma$  was detected by ELISA, data was shown as mean  $\pm$  SE of three individual experiments. \* $0.01 < p < 0.05$ , \*\*\*\* $p < 0.0001$ .

**Figure S3**

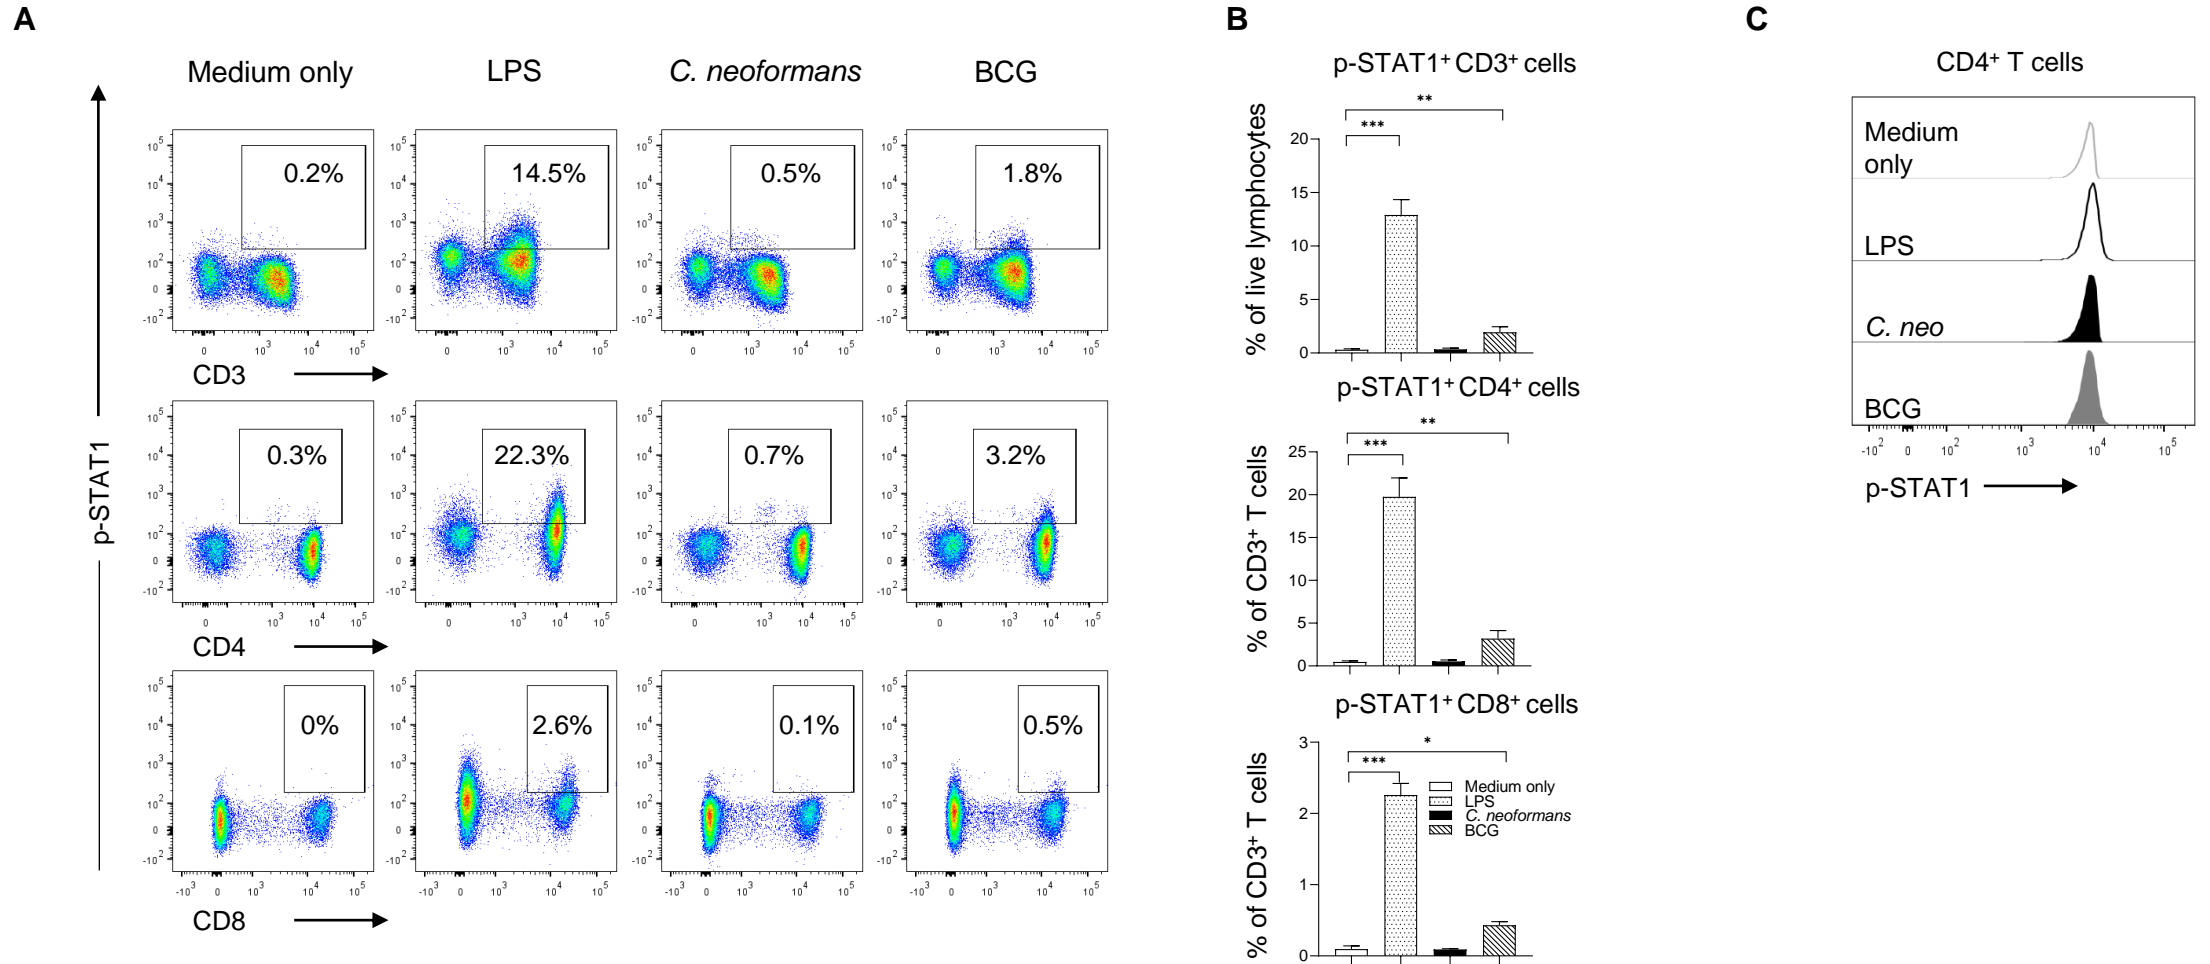

**Figure S3: *C. neoformans* stimulates phosphorylation of STAT1 in CD4<sup>+</sup> T cells.** PBMCs were stimulated for 30 minutes with LPS, *C. neoformans*, or BCG, phosphorylation of STAT1 in T cell subsets (A and B) and its fluorescence intensity was analyzed by flow cytometry (C). \*0.01 < p < 0.05, \*\*0.001 < p < 0.01, \*\*\* < 0.0001 < p < 0.001.

Figure S4

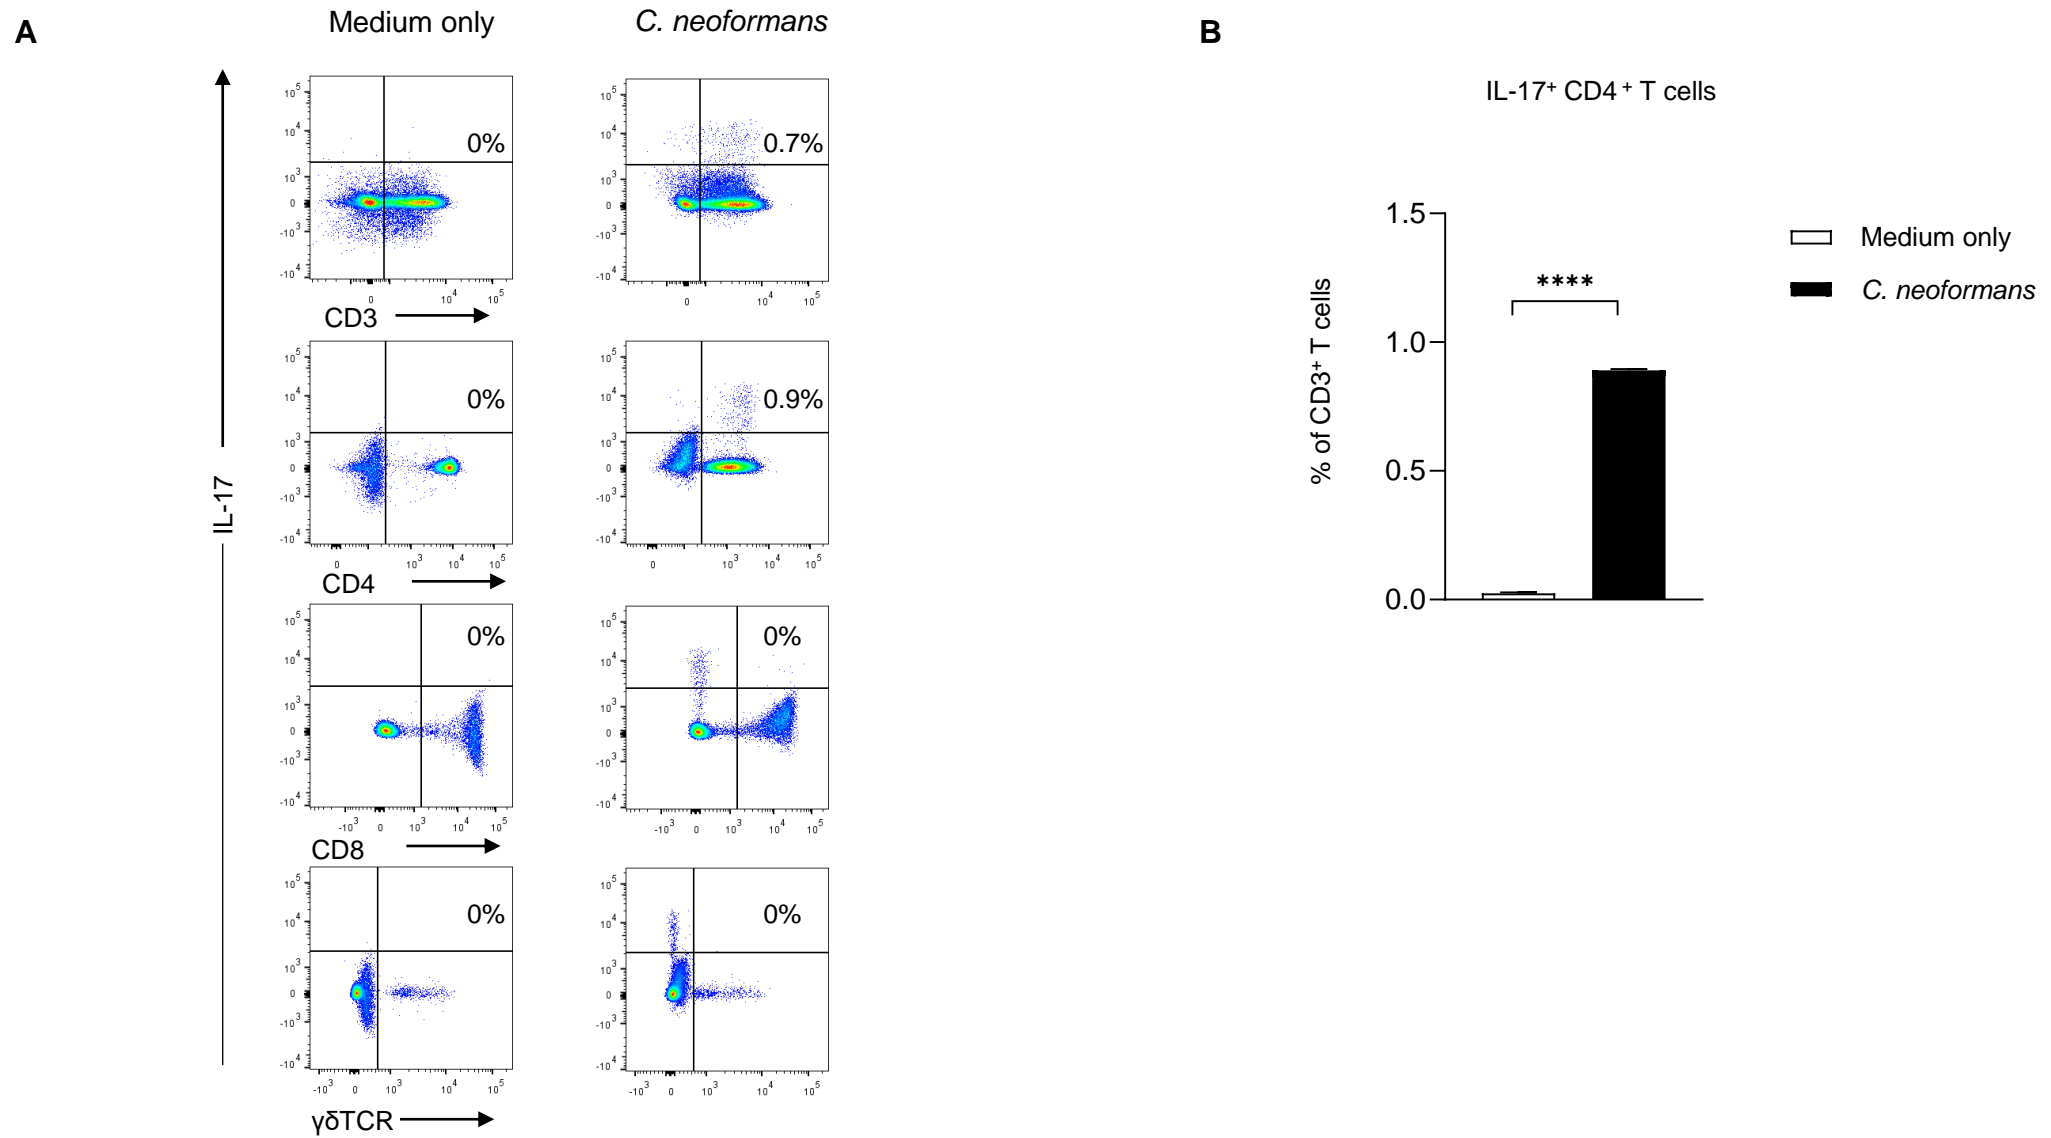

**Figure S4:** *C. neoformans* stimulates IL-17 production by CD4<sup>+</sup> T cells *in vitro*. PBMCs were stimulated with *C. neoformans* for 30min plus protein transport inhibitor cocktail for 5 hours before collected cells, IL-17-producing cells were analyzed by flow cytometry: representative data of IL-17<sup>+</sup> T cells in  $\alpha\beta$ TCR<sup>+</sup> T cells(CD3<sup>+</sup> $\gamma\delta$ TCR<sup>-</sup> cells) and  $\gamma\delta$ TCR<sup>+</sup> T cells (A), and percentages of IL-17<sup>+</sup> CD4<sup>+</sup>T cells in live CD3<sup>+</sup> cells (B). \*\*\*\* p < 0.0001.
